# Supplementary figures and images for: Metabolome Analysis of Constituents in Membrane Vesicles for Clostridium thermocellum Growth Stimulation
Source: MDPI journal article supplement (doi:10.3390/microorganisms9030593), 2021-03-13

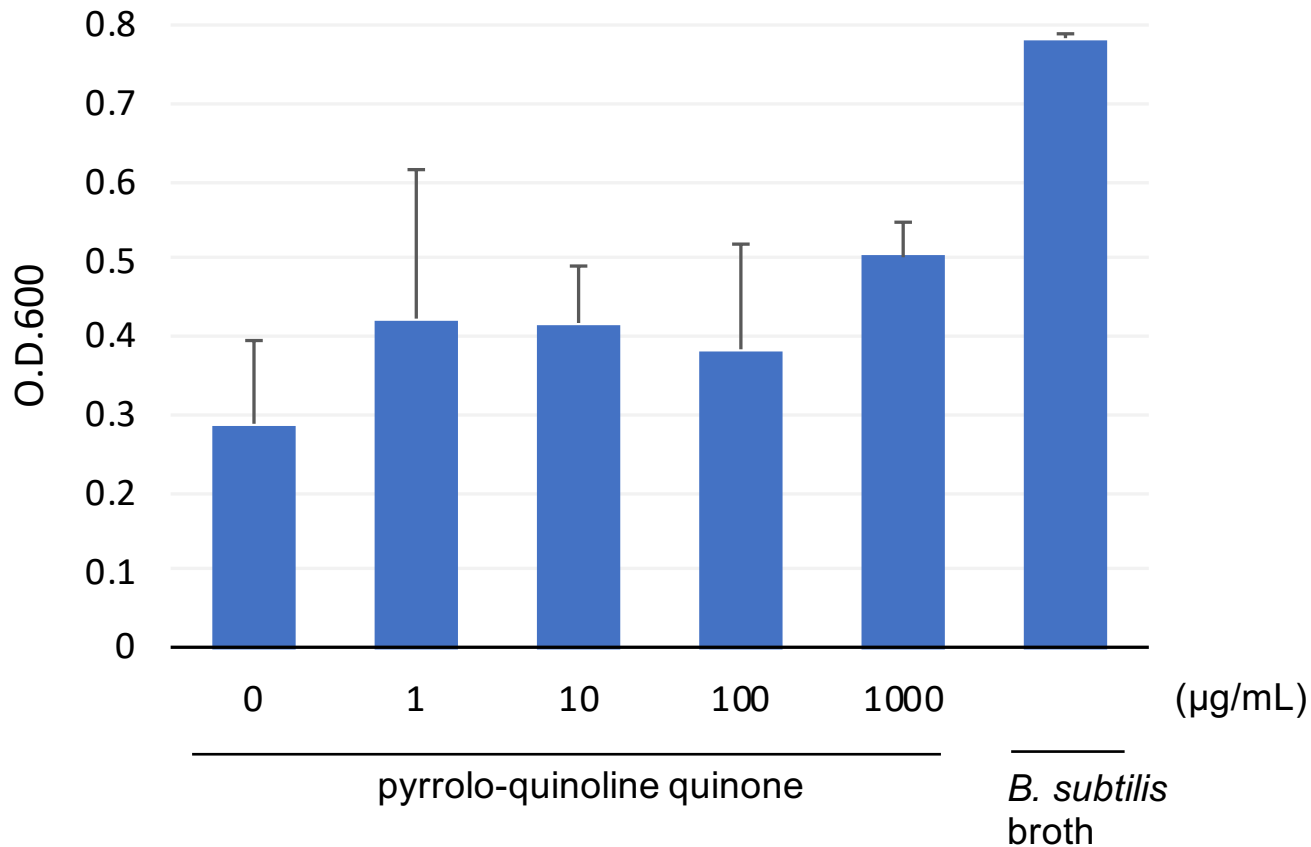

Supplement: s1 [file s1]

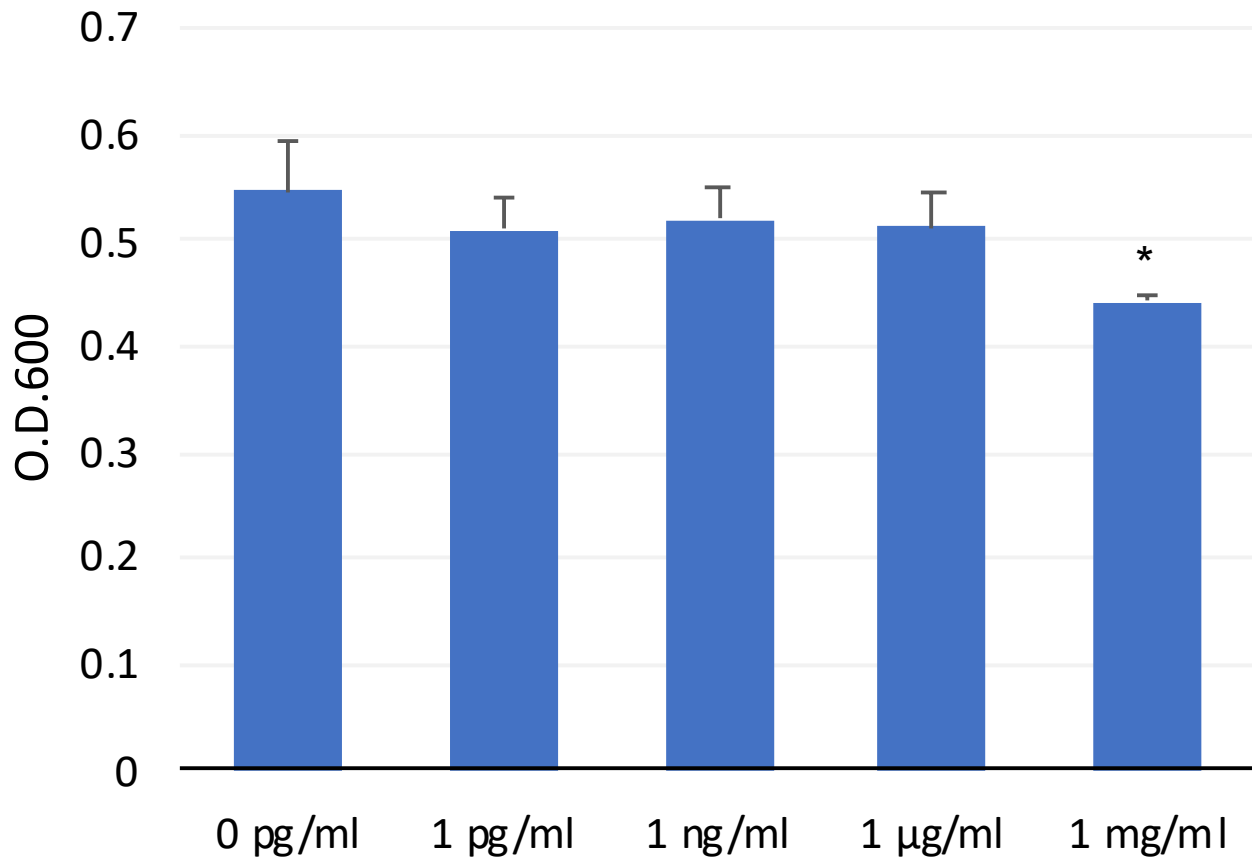

Supplement: s1 [file s1]

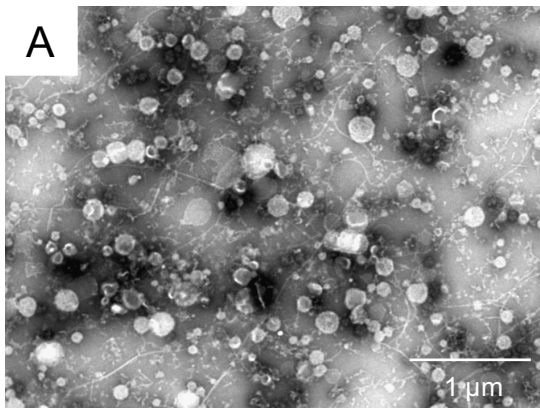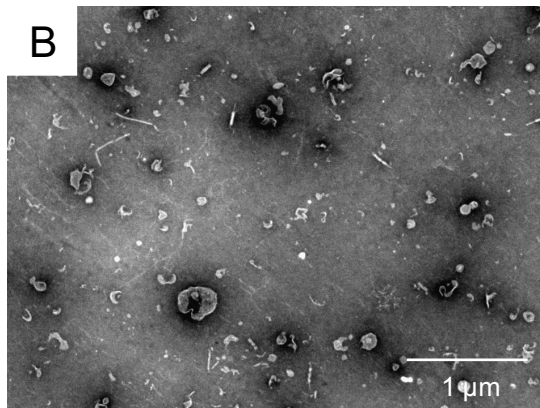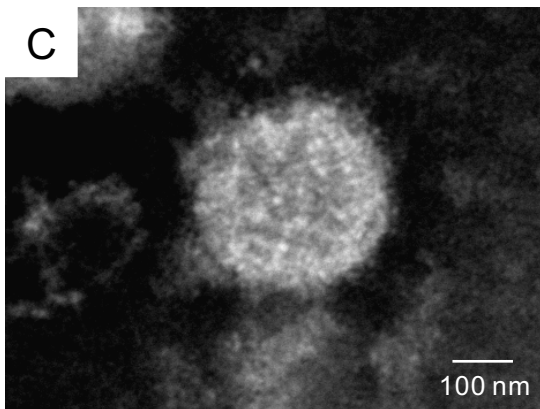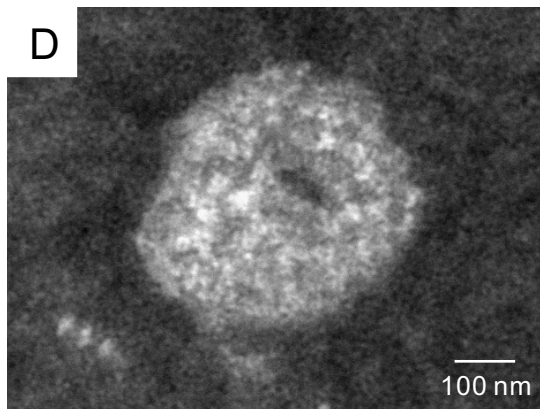

Supplement: s1 [file s1]
